# Supplementary material for: Association of Electronic Cigarette Use With Smoking Habits, Demographic Factors, and Respiratory Symptoms
Source: PubMed Central journal article supplement (PMC6324524; doi:10.1001/jamanetworkopen.2018.0789), 2018-07-20
Supplement: jamanetwopen-1-e180789-s001.pdf [file jamanetwopen-1-e180789-s001.pdf]

## Supplementary Online Content

Hedman L, Backman H, Stridsman C, et al. Association of electronic cigarette use with smoking habits, demographic factors, and respiratory symptoms. *JAMA Netw Open*. 2018;1(3):e180789. doi:10.1001/jamanetworkopen.2018.0789

**eTable 1.** Long-standing Cough in Relation to Smoking Habits and E-Cigarette Use, Analyzed by Logistic Regression, Presented as Unadjusted and Adjusted for Sex, Age Group, Educational Level, and Study Area and Expressed as Odds Ratios (OR) With 95% Confidence Intervals (CI).

**eTable 2.** Sputum Production in Relation to Smoking Habits and E-Cigarette Use, Analyzed by Logistic Regression, Presented as Unadjusted and Adjusted for Sex, Age Group, Educational Level, and Study Area and Expressed as Odds Ratios (OR) With 95% Confidence Intervals (CI).

**eTable 3.** Chronic Productive Cough in Relation to Smoking Habits and E-Cigarette Use, Analyzed by Logistic Regression, Presented as Unadjusted and Adjusted for Sex, Age Group, Educational Level, and Study Area and Expressed as Odds Ratios (OR) With 95% Confidence Intervals (CI).

**eTable 4.** Any Wheeze in Relation to Smoking Habits and E-Cigarette Use, Analyzed by Logistic Regression, Presented as Unadjusted and Adjusted for Sex, Age Group, Educational Level, and Study Area and Expressed as Odds Ratios (OR) With 95% Confidence Intervals (CI).

**eTable 5.** Recurrent Wheeze in Relation to Smoking Habits and E-Cigarette Use, Analyzed by Logistic Regression, Presented as Unadjusted and Adjusted for Sex, Age Group, Educational Level, and Study Area and Expressed as Odds Ratios (OR) With 95% Confidence Intervals (CI).

This supplementary material has been provided by the authors to give readers additional information about their work.

Number of eTables: 5

eTable 1-5: Unadjusted and adjusted logistic regression analyses. Dependent variables: longstanding cough, sputum production, chronic productive cough, recurrent wheeze and any wheeze. Independent variables: smoking habits and e-cigarette use, sex, age-group, educational level and study area.

**eTable 1. Long-standing cough in relation to smoking habits and e-cigarette use, analyzed by logistic regression, presented as unadjusted and adjusted for sex, age group, educational level, and study area and expressed as odds ratios (OR) with 95% confidence intervals (CI).**

|                                   | Unadjusted |             | Adjusted |             |
|-----------------------------------|------------|-------------|----------|-------------|
|                                   | OR         | (95% CI)    | OR       | (95% CI)    |
| Non-smoker, No e-cigarette use    | 1.00       |             | 1.00     |             |
| Non-smoker, E-cigarette use       | 1.81       | (1.08-3.02) | 1.60     | (0.92-2.80) |
| Former smoker, No e-cigarette use | 1.09       | (1.00-1.19) | 1.10     | (1.00-1.20) |
| Former smoker, E-cigarette use    | 1.69       | (0.95-3.01) | 1.57     | (0.86-2.86) |
| Smoker, No e-cigarette use        | 1.96       | (1.78-2.17) | 1.93     | (1.74-2.13) |
| Smoker, E-cigarette use           | 2.79       | (2.19-3.56) | 2.83     | (2.21-3.63) |

**eTable 2. Sputum production in relation to smoking habits and e-cigarette use, analyzed by logistic regression, presented as unadjusted and adjusted for sex, age group, educational level, and study area and expressed as odds ratios (OR) with 95% confidence intervals (CI).**

|                                   | Unadjusted |             | Adjusted |             |
|-----------------------------------|------------|-------------|----------|-------------|
|                                   | OR         | (95% CI)    | OR       | (95% CI)    |
| Non-smoker, No e-cigarette use    | 1.00       |             | 1.00     |             |
| Non-smoker, E-cigarette use       | 2.33       | (1.46-3.71) | 1.96     | (1.18-3.24) |
| Former smoker, No e-cigarette use | 1.32       | (1.22-1.43) | 1.28     | (1.18-1.39) |
| Former smoker, E-cigarette use    | 1.25       | (0.68-2.32) | 1.12     | (0.59-2.12) |
| Smoker, No e-cigarette use        | 2.54       | (2.32-2.79) | 2.44     | (2.22-2.68) |
| Smoker, E-cigarette use           | 4.66       | (3.74-5.80) | 4.52     | (3.61-5.65) |

**eTable 3. Chronic productive cough in relation to smoking habits and e-cigarette use, analyzed by logistic regression, presented as unadjusted and adjusted for sex, age group, educational level, and study area and expressed as odds ratios (OR) with 95% confidence intervals (CI).**

|                                   | Unadjusted |             | Adjusted |             |
|-----------------------------------|------------|-------------|----------|-------------|
|                                   | OR         | (95% CI)    | OR       | (95% CI)    |
| Non-smoker, No e-cigarette use    | 1.00       |             | 1.00     |             |
| Non-smoker, E-cigarette use       | 0.87       | (0.28-2.77) | 0.62     | (0.15-2.51) |
| Former smoker, No e-cigarette use | 1.57       | (1.37-1.79) | 1.36     | (1.19-1.57) |
| Former smoker, E-cigarette use    | 1.83       | (0.74-4.55) | 1.73     | (0.69-4.30) |
| Smoker, No e-cigarette use        | 2.47       | (2.13-2.88) | 2.28     | (1.96-2.67) |
| Smoker, E-cigarette use           | 4.62       | (3.40-6.30) | 4.43     | (3.22-6.08) |

**eTable 4. Any wheeze in relation to smoking habits and e-cigarette use, analyzed by logistic regression, presented as unadjusted and adjusted for sex, age group, educational level, and study area and expressed as odds ratios (OR) with 95% confidence intervals (CI).**

|                                   | Unadjusted |             | Adjusted |             |
|-----------------------------------|------------|-------------|----------|-------------|
|                                   | OR         | (95% CI)    | OR       | (95% CI)    |
| Non-smoker, No e-cigarette use    | 1.00       |             | 1.00     |             |
| Non-smoker, E-cigarette use       | 0.88       | (0.48-1.61) | 0.87     | (0.46-1.64) |
| Former smoker, No e-cigarette use | 1.36       | (1.26-1.47) | 1.37     | (1.27-1.49) |
| Former smoker, E-cigarette use    | 1.82       | (1.07-3.08) | 1.73     | (1.01-2.97) |
| Smoker, No e-cigarette use        | 2.90       | (2.66-3.16) | 2.83     | (2.59-3.10) |
| Smoker, E-cigarette use           | 3.72       | (2.99-4.64) | 3.86     | (3.08-4.83) |

**eTable 5. Recurrent wheeze in relation to smoking habits and e-cigarette use, analyzed by logistic regression, presented as unadjusted and adjusted for sex, age group, educational level, and study area and expressed as odds ratios (OR) with 95% confidence intervals (CI).**

|                                   | Unadjusted |             | Adjusted |             |
|-----------------------------------|------------|-------------|----------|-------------|
|                                   | OR         | (95% CI)    | OR       | (95% CI)    |
| Non-smoker, No e-cigarette use    | 1.00       |             | 1.00     |             |
| Non-smoker, E-cigarette use       | 1.53       | (0.74-3.17) | 1.46     | (0.67-3.18) |
| Former smoker, No e-cigarette use | 1.62       | (1.45-1.80) | 1.48     | (1.32-1.65) |
| Former smoker, E-cigarette use    | 2.44       | (1.26-4.76) | 2.16     | (1.07-4.37) |
| Smoker, No e-cigarette use        | 3.36       | (2.99-3.77) | 3.02     | (2.68-3.41) |
| Smoker, E-cigarette use           | 6.94       | (5.45-8.82) | 6.88     | (5.37-8.80) |
